# Supplementary material for: Crystal Structure, Antibacterial and Cytotoxic Activities of a New Complex of Bismuth(III) with Sulfapyridine
Source: Molecules. 2013 Jan 24;18(2):1464–76. doi: 10.3390/molecules18021464 (PMC6270105; doi:10.3390/molecules18021464)

**Supporting Information:** Figures S1, S2, and S3.

**Figure S1.** The infrared spectra of sulfapyridine (top) and its Bi(III) complex (bottom), [Bi(sp)<sub>3</sub>Cl<sub>3</sub>].

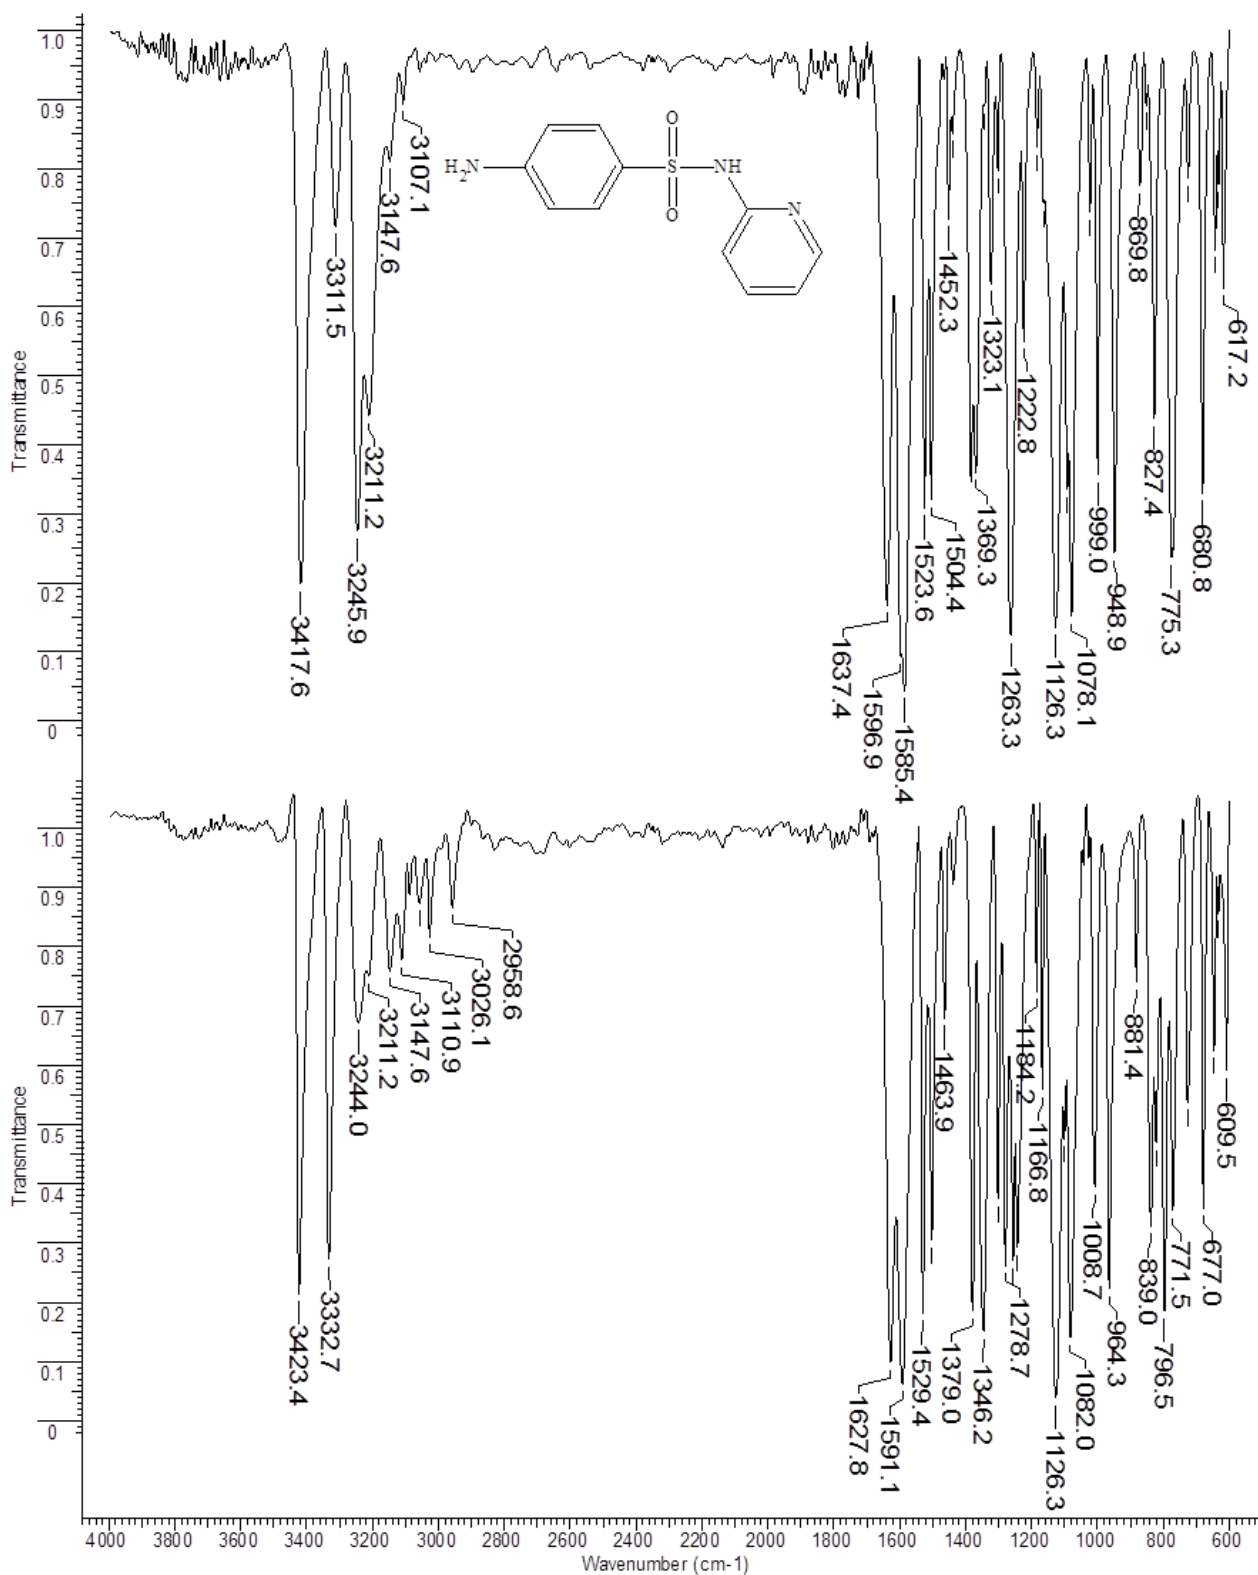

**Figure S2.** Expanded view of the ESI(+)-MS of the molecular ion of the complex,  $[\text{BiCl}_3(\text{C}_{11}\text{H}_{11}\text{N}_3\text{O}_2\text{S})_3]^+\bullet$  ( $\text{M}^+\bullet$ ). The complex was dissolved in MeOH containing 0.1% formic acid.

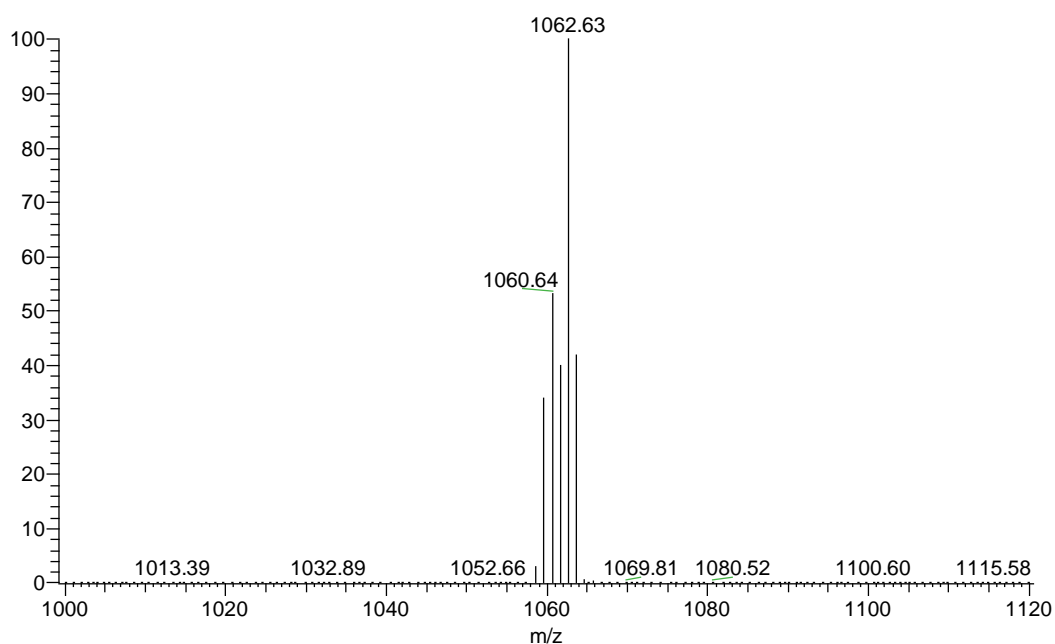

**Figure S3.**  $^1\text{H}$ -NMR spectra of sulfapyridine (top) and its Bi(III) complex  $[\text{Bi}(\text{sp})_3\text{Cl}_3]$  (bottom). The solvent is  $\text{DMF-}d_7$  ( $N,N$ -dimethylformamide- $d_7$ ).

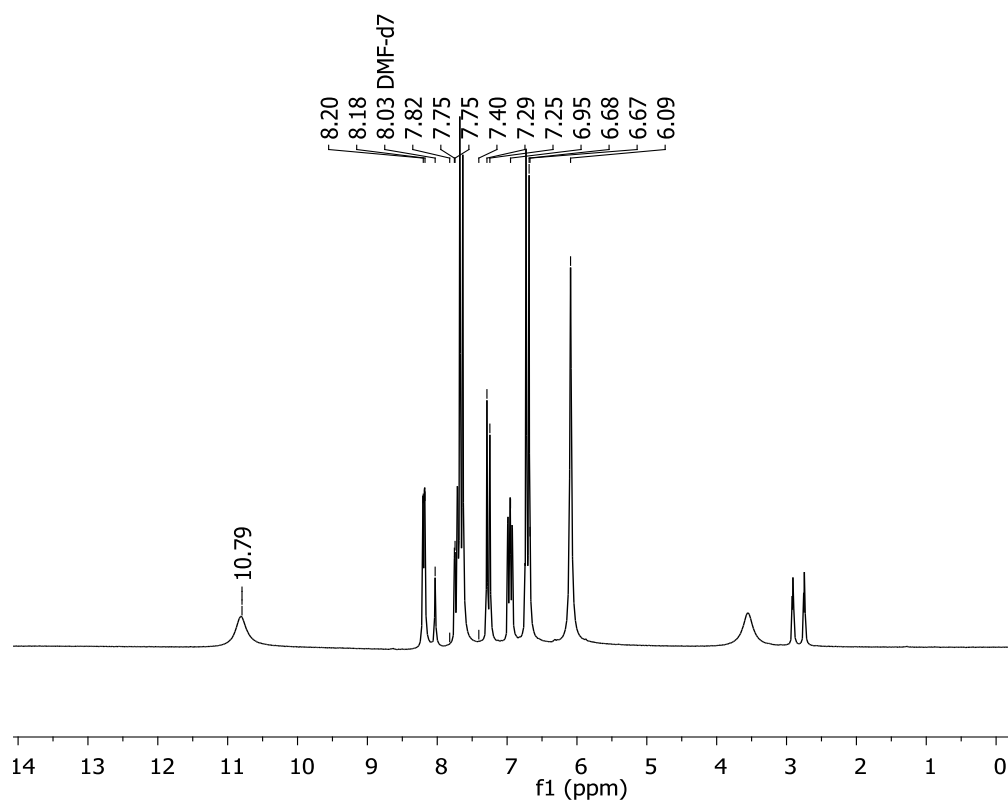

Figure S3. Cont.

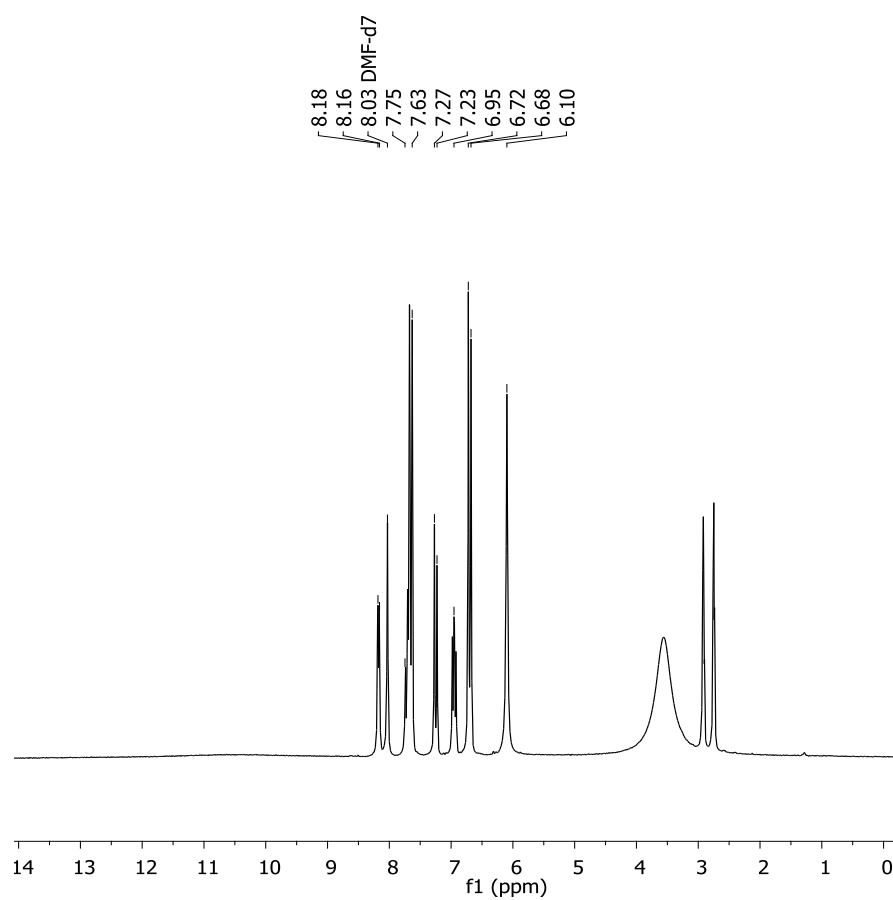

Supplement: Supplementary file 1 [file molecules-18-01464-s002.pdf]
